# Supplementary material for: The Association of Total Meat Intake with Cardio-Metabolic Disease Risk Factors and Measures of Sub-Clinical Atherosclerosis in an Urbanising Community of Southern India: A Cross-Sectional Analysis for the APCAPS Cohort
Source: MDPI journal article supplement (doi:10.3390/nu16050746), 2024-03-05
Supplement: s1 [file s1]

**Supplementary Table S1:** Association between total meat intake and CVD risk factors and measures of subclinical atherosclerosis among *males* who were consuming meat:  $\beta$ -coefficients (95% confidence interval) per SD change and 10 gram per 1000 kcal per day of meat intake

| CVD risk factor                  | Regression | Per SD change                  |         | 10 gram/1000 kcal/day          |         |
|----------------------------------|------------|--------------------------------|---------|--------------------------------|---------|
|                                  | Models     | $\beta$ -coef (95% CI)         | p-value | $\beta$ -coef (95% CI)         | p-value |
| SBP, (n= 3097)                   | Model 1    | 0.68 (0.16, 1.21)              | 0.011*  | 1.01 (0.35, 1.67)              | 0.003*  |
|                                  | Model 2    | 0.45 (−0.08, 0.98)             | 0.099   | 0.73 (0.07, 1.39)              | 0.032   |
|                                  | Model 3    | 0.31 (−0.25, 0.87)             | 0.276   | 0.54 (−0.13, 1.20)             | 0.114   |
|                                  | Model 4    | 0.18 (−0.41, 0.76)             | 0.550   | 0.56 (−0.11, 1.22)             | 0.101   |
| DBP, (n= 3097)                   | Model 1    | 1.01 (0.58, 1.44)              | <0.001* | 1.20 (0.66, 1.74)              | <0.001* |
|                                  | Model 2    | 0.75 (0.32, 1.19)              | 0.001*  | 0.89 (0.35, 1.44)              | 0.001*  |
|                                  | Model 3    | 0.62 (0.16, 1.08)              | 0.008*  | 0.73 (0.18, 1.28)              | 0.010*  |
|                                  | Model 4    | 0.49 (0.01, 0.97)              | 0.048   | 0.75 (0.20, 1.30)              | 0.007*  |
| BMI, (n= 3097)                   | Model 1    | 0.56 (0.44, 0.69)              | <0.001* | 0.64 (0.48, 0.80)              | <0.001* |
|                                  | Model 2    | 0.44 (0.32, 0.56)              | <0.001* | 0.49 (0.33, 0.64)              | <0.001* |
|                                  | Model 3    | 0.44 (0.31, 0.57)              | <0.001* | 0.44 (0.28, 0.59)              | <0.001* |
|                                  | Model 4    | 0.32 <sup>a</sup> (0.19, 0.46) | <0.001* | 0.46 <sup>b</sup> (0.31, 0.61) | <0.001* |
| WC, (n= 3097)                    | Model 1    | 15.22 (11.84, 18.61)           | <0.001* | 17.12 (12.86, 21.38)           | <0.001* |
|                                  | Model 2    | 11.26 (7.91, 14.60)            | <0.001* | 12.25 (8.06, 16.45)            | <0.001* |
|                                  | Model 3    | 10.85 (7.33, 14.37)            | <0.001* | 10.74 (6.54, 14.94)            | <0.001* |
|                                  | Model 4    | 7.88 (4.21, 11.55)             | <0.001* | 11.27 (7.10, 15.44)            | <0.001* |
| Fasting Glucose (log), (n= 3097) | Model 1    | −0.001 (−0.006, 0.005)         | 0.871   | −0.002 (−0.005, 0.009)         | 0.667   |
|                                  | Model 2    | −0.003 (−0.009, 0.003)         | 0.188   | −0.002 (−0.009, 0.006)         | 0.713   |
|                                  | Model 3    | −0.003 (−0.009, 0.004)         | 0.415   | −0.002 (−0.010, 0.005)         | 0.536   |
|                                  | Model 4    | −0.003 (−0.009, 0.004)         | 0.454   | −0.002 (−0.010, 0.005)         | 0.528   |
| HOMA-IR (log), (n= 3097)         | Model 1    | 0.062 (0.029, 0.094)           | 0.001*  | 0.079 (0.038, 0.120)           | 0.001*  |
|                                  | Model 2    | 0.044 (0.011, 0.077)           | 0.010*  | 0.057 (0.015, 0.098)           | 0.007*  |
|                                  | Model 3    | 0.046 (0.011, 0.080)           | 0.009   | 0.048 (0.007, 0.089)           | 0.022*  |
|                                  | Model 4    | 0.037 (0.001, 0.073)           | 0.045   | 0.050 (0.009, 0.091)           | 0.017*  |
| Total cholesterol, (n= 3097)     | Model 1    | 3.23 (1.97, 4.89)              | <0.001* | 4.12 (2.54, 5.71)              | <0.001* |
|                                  | Model 2    | 2.76 (1.48, 4.03)              | <0.001* | 3.55 (1.95, 5.15)              | <0.001* |
|                                  | Model 3    | 2.89 (1.55, 4.24)              | <0.001* | 3.23 (1.62, 4.84)              | <0.001* |
|                                  | Model 4    | 2.32 (0.91, 3.72)              | 0.001*  | 3.35 (1.74, 4.95)              | <0.001* |
| HDL                              | Model 1    | −0.18 (−0.62, 0.26)            | 0.418   | 0.005 (−0.54, 0.56)            | 0.985   |
|                                  | Model 2    | 0.003 (−0.44, 0.45)            | 0.990   | 0.23 (−0.33, 0.78)             | 0.424   |
|                                  | Model 3    | 0.08 (−0.38, 0.55)             | 0.729   | 0.32 (−0.23, 0.88)             | 0.255   |
|                                  | Model 4    | 0.07 (−0.42, 0.56)             | 0.781   | 0.33 (−0.23, 0.89)             | 0.251   |
| LDL                              | Model 1    | 2.22 (1.17, 3.28)              | <0.001* | 3.07 (1.75, 4.40)              | <0.001* |
|                                  | Model 2    | 1.71 (0.65, 2.78)              | 0.002*  | 2.47 (1.13, 3.81)              | <0.001* |
|                                  | Model 3    | 1.82 (0.70, 2.94)              | 0.002*  | 2.20 (0.86, 3.55)              | 0.001*  |
|                                  | Model 4    | 1.52 (0.34, 2.70)              | 0.011*  | 2.26 (0.92, 3.61)              | 0.001*  |
| TG (log)                         | Model 1    | 0.047 (0.030, 0.064)           | <0.001* | 0.046 (0.025, 0.066)           | <0.001* |
|                                  | Model 2    | 0.041 (0.024, 0.058)           | <0.001* | 0.038 (0.017, 0.059)           | <0.001* |
|                                  | Model 3    | 0.040 (0.022, 0.058)           | <0.001* | 0.033 (0.012, 0.054)           | 0.003*  |
|                                  | Model 4    | 0.032 (0.012, 0.050)           | 0.001*  | 0.034 (0.013, 0.056)           | 0.002*  |
| CRP (log)                        | Model 1    | −0.001 (−0.046, 0.044)         | 0.966   | 0.045 (−0.012, 0.102)          | 0.121   |
|                                  | Model 2    | −0.015 (−0.061, 0.031)         | 0.525   | 0.029 (−0.028, 0.087)          | 0.316   |
|                                  | Model 3    | −0.011 (−0.059, 0.038)         | 0.662   | 0.022 (−0.035, 0.080)          | 0.449   |
|                                  | Model 4    | 0.005 (−0.046, 0.055)          | 0.859   | 0.020 (−0.037, 0.078)          | 0.492   |
| CIMT (n= 1682)                   | Model 1    | −0.010 (−0.019, −0.001)        | 0.040   | −0.011 (−0.023, 0.002)         | 0.099   |
|                                  | Model 2    | −0.007 (−0.016, 0.002)         | 0.145   | −0.007 (−0.020, 0.006)         | 0.306   |
|                                  | Model 3    | −0.005 (−0.015, 0.005)         | 0.297   | −0.005 (−0.018, 0.008)         | 0.409   |
|                                  | Model 4    | −0.002 (−0.013, 0.009)         | 0.690   | −0.006 (−0.019, 0.007)         | 0.360   |
| PWV (log)                        | Model 1    | 0.009 (0.002, 0.016)           | 0.009*  | 0.010 (−0.0001, 0.019)         | 0.052   |
|                                  | Model 2    | 0.008 (0.001, 0.015)           | 0.029*  | 0.007 (−0.003, 0.017)          | 0.148   |
|                                  | Model 3    | 0.005 (−0.003, 0.012)          | 0.233   | 0.004 (−0.005, 0.014)          | 0.382   |
|                                  | Model 4    | 0.002 (−0.006, 0.010)          | 0.675   | 0.005 (−0.005, 0.015)          | 0.323   |
| AIx (log)                        | Model 1    | 0.042 (0.019, 0.065)           | <0.001* | 0.027 (−0.004, 0.058)          | 0.084   |
|                                  | Model 2    | 0.043 (0.020, 0.067)           | <0.001* | 0.028 (−0.003, 0.060)          | 0.079   |
|                                  | Model 3    | 0.036 (0.011, 0.061)           | 0.004*  | 0.023 (−0.009, 0.054)          | 0.159   |

| Model 4 | 0.029 (0.003, 0.056) | 0.028* | 0.025 (−0.007, 0.056) | 0.131 |
|---------|----------------------|--------|-----------------------|-------|
|---------|----------------------|--------|-----------------------|-------|

SD, standard deviation; SBP, systolic blood pressure; DBP, diastolic blood pressure; CIMT, Carotid Intima-Media Thickness; PWV, Pulse Wave Velocity; AIx, Augmentation Index; BMI, body mass index; WC, waist circumference; HDL-C, high density lipoprotein cholesterol; LDL-C, low density lipoprotein cholesterol; HOMA-IR, Homeostasis model assessment insulin resistance;

Data was analysed for 3097 males for all CVD risk factors. For CIMT, PWV, and AIx, data was analyzed for 1682, 1658 and 1584 males, respectively; 1 SD of total meat for male for all CVD risk factors was equal to 27.79 grams/day; 1 SD total meat for male for CIMT was equal to 25.92 grams/day; 1 SD total meat for male for PWV was equal to 26.00 grams/day; 1 SD total meat for male for AIx was equal to 26.67 grams/day; \* significant association after accounting for the effect of multiple testing using the Benjamini–Hochberg method; \* $\beta$ -coefficient of 0.32 means that a 1 SD (27.79 grams/day ) increase in meat intake among male participants was associated with 0.32 kg/m<sup>2</sup> higher BMI after adjusting for the effect of potential confounders on BMI. <sup>b</sup> $\beta$ -coefficient of 0.46 means that a-10 gram per 1000 kcal per day increase in meat intake among male participants was associated with 0.46 kg/m<sup>2</sup> higher BMI after adjusting for the effect of potential confounders on BMI.

**Supplementary Table S2:** Association between total meat intake and CVD risk factors and measures of subclinical atherosclerosis among *females* who were consuming meat:  $\beta$ -coefficients (95% confidence interval) per SD change and 10 gram per 1000 kcal per day of meat intake

| CVD risk factor                  | Regression | Per SD change                  |         | 10 gram/1000 kcal/day          |         |
|----------------------------------|------------|--------------------------------|---------|--------------------------------|---------|
|                                  | Models     | $\beta$ -coef (95% CI)         | p-value | $\beta$ -coef (95% CI)         | p-value |
| SBP, (n= 2675)                   | Model 1    | 0.48 (−0.01, 0.97)             | 0.053   | 1.15 (0.42, 1.87)              | 0.002*  |
|                                  | Model 2    | 0.41 (−0.08, 0.91)             | 0.100   | 1.07 (0.34, 1.80)              | 0.004*  |
|                                  | Model 3    | 0.35 (−0.19, 0.88)             | 0.201   | 1.03 (0.29, 1.76)              | 0.006*  |
|                                  | Model 4    | 0.43 (−0.112, 0.97)            | 0.120   | 0.98 (0.24, 1.72)              | 0.009*  |
| DBP, (n= 2675)                   | Model 1    | 0.46 (0.05, 0.86)              | 0.027   | 0.85 (0.25, 1.45)              | 0.006*  |
|                                  | Model 2    | 0.38 (−0.03, 0.78)             | 0.072   | 0.76 (0.15, 1.36)              | 0.014*  |
|                                  | Model 3    | 0.34 (−0.10, 0.79)             | 0.128   | 0.73 (0.12, 1.34)              | 0.019*  |
|                                  | Model 4    | 0.39 (−0.06, 0.84)             | 0.090   | 0.71 (0.10, 1.33)              | 0.023*  |
| BMI, (n= 2675)                   | Model 1    | 0.28 (0.13, 0.42)              | <0.001* | 0.29 (0.07, 0.50)              | 0.009*  |
|                                  | Model 2    | 0.18 (0.04, 0.33)              | 0.015   | 0.18 (−0.04, 0.39)             | 0.106   |
|                                  | Model 3    | 0.13 (−0.02, 0.29)             | 0.094   | 0.15 (−0.06, 0.37)             | 0.165   |
|                                  | Model 4    | 0.12 (−0.04, 0.28)             | 0.152   | 0.17 (−0.04, 0.39)             | 0.116   |
| WC, (n= 2675)                    | Model 1    | 7.04 (3.47, 10.61)             | <0.001* | 6.14 (0.81, 11.47)             | 0.024*  |
|                                  | Model 2    | 4.72 (1.15, 8.29)              | 0.010*  | 3.42 (−1.88, 8.72)             | 0.205   |
|                                  | Model 3    | 3.04 (−0.81, 6.89)             | 0.122   | 2.56 (−2.75, 7.87)             | 0.345   |
|                                  | Model 4    | 2.33 (−1.59, 6.25)             | 0.243   | 3.30 (−2.04, 8.65)             | 0.226   |
| Fasting Glucose (log), (n= 2675) | Model 1    | 0.004 (−0.003, 0.010)          | 0.276   | 0.012 (0.003, 0.022)           | 0.008*  |
|                                  | Model 2    | 0.002 (−0.005, 0.008)          | 0.647   | 0.010 (0.001, 0.019)           | 0.031   |
|                                  | Model 3    | 0.004 (−0.003, 0.011)          | 0.247   | 0.011 (0.002, 0.021)           | 0.018*  |
|                                  | Model 4    | 0.005 (−0.002, 0.012)          | 0.136   | 0.011 (0.001, 0.020)           | 0.028   |
| HOMA-IR (log), (n= 2675)         | Model 1    | 0.056 (0.024, 0.087)           | 0.001*  | 0.085 (0.038, 0.132)           | <0.001* |
|                                  | Model 2    | 0.040 (0.008, 0.071)           | 0.013*  | 0.067 (0.020, 0.114)           | 0.005*  |
|                                  | Model 3    | 0.045 (0.010, 0.079)           | 0.011*  | 0.068 (0.021, 0.115)           | 0.005*  |
|                                  | Model 4    | 0.041 (0.007, 0.076)           | 0.019   | 0.073 (0.025, 0.120)           | 0.003*  |
| Total cholesterol, (n= 2675)     | Model 1    | 2.21 (0.91, 3.51)              | 0.001*  | 3.21 (1.27, 5.14)              | 0.001*  |
|                                  | Model 2    | 2.06 (0.75, 3.37)              | 0.002*  | 3.02 (1.07, 4.97)              | 0.002*  |
|                                  | Model 3    | 2.21 (0.79, 3.63)              | 0.002*  | 2.98 (1.02, 4.94)              | 0.003*  |
|                                  | Model 4    | 2.21 <sup>a</sup> (0.77, 3.66) | 0.003*  | 3.10 <sup>b</sup> (1.12, 5.07) | 0.002*  |
| HDL, (n= 2675)                   | Model 1    | 0.16 (−0.31, 0.62)             | 0.507   | −0.29 (−0.98, 0.41)            | 0.419   |
|                                  | Model 2    | 0.24 (−0.23, 0.71)             | 0.326   | −0.21 (−0.90, 0.49)            | 0.567   |
|                                  | Model 3    | 0.18 (−0.33, 0.69)             | 0.492   | −0.26 (−0.96, 0.44)            | 0.474   |
|                                  | Model 4    | 0.11 (−0.41, 0.62)             | 0.684   | −0.19 (−0.90, 0.51)            | 0.594   |
| LDL, (n= 2675)                   | Model 1    | 1.75 (0.67, 2.83)              | 0.002*  | 2.68 (1.07, 4.29)              | 0.001*  |
|                                  | Model 2    | 1.55 (0.46, 2.64)              | 0.005*  | 2.44 (0.82, 4.06)              | 0.003*  |
|                                  | Model 3    | 1.64 (0.46, 2.82)              | 0.006*  | 2.42 (0.79, 4.04)              | 0.004*  |
|                                  | Model 4    | 1.68 (0.48, 2.88)              | 0.006*  | 2.47 (0.83, 4.11)              | 0.003*  |
| TG (log), (n= 2675)              | Model 1    | 0.015 (−0.002, 0.031)          | 0.081   | 0.032 (0.007, 0.056)           | 0.011*  |
|                                  | Model 2    | 0.015 (−0.002, 0.031)          | 0.089   | 0.032 (0.007, 0.056)           | 0.012*  |
|                                  | Model 3    | 0.018 (0.000, 0.036)           | 0.053   | 0.032 (0.007, 0.057)           | 0.011*  |
|                                  | Model 4    | 0.018 (−0.001, 0.036)          | 0.058   | 0.034 (0.008, 0.059)           | 0.009*  |
| CRP (log), (n= 2675)             | Model 1    | 0.054 (0.007, 0.101)           | 0.024   | 0.049 (−0.021, 0.120)          | 0.169   |
|                                  | Model 2    | 0.036 (−0.012, 0.083)          | 0.143   | 0.028 (−0.043, 0.098)          | 0.443   |
|                                  | Model 3    | 0.047 (−0.004, 0.099)          | 0.071   | 0.031 (−0.040, 0.101)          | 0.393   |
|                                  | Model 4    | 0.041 (−0.012, 0.093)          | 0.127   | 0.039 (−0.033, 0.110)          | 0.291   |
| CIMT (n= 1493)                   | Model 1    | −0.0003 (−0.010, 0.010)        | 0.961   | 0.001 (−0.013, 0.016)          | 0.842   |

|                     |         |                        |       |                        |       |
|---------------------|---------|------------------------|-------|------------------------|-------|
|                     | Model 2 | 0.001 (−0.009, 0.011)  | 0.812 | 0.003 (−0.011, 0.017)  | 0.688 |
|                     | Model 3 | 0.002 (−0.009, 0.013)  | 0.699 | 0.003 (−0.011, 0.018)  | 0.642 |
|                     | Model 4 | 0.002 (−0.009, 0.013)  | 0.699 | 0.004 (−0.011, 0.018)  | 0.637 |
|                     | Model 1 | −0.006 (−0.013, 0.002) | 0.139 | −0.009 (−0.019, 0.001) | 0.089 |
| PWV (log) (n= 1493) | Model 2 | −0.006 (−0.014, 0.001) | 0.090 | −0.010 (−0.020, 0.001) | 0.066 |
|                     | Model 3 | −0.005 (−0.013, 0.003) | 0.225 | −0.008 (−0.019, 0.002) | 0.119 |
|                     | Model 4 | −0.004 (−0.012, 0.004) | 0.298 | −0.009 (−0.020, 0.001) | 0.082 |
|                     | Model 1 | 0.024 (0.0003, 0.0469) | 0.047 | 0.018 (−0.015, 0.051)  | 0.277 |
| AI (log) (n= 1411)  | Model 2 | 0.025 (0.001, 0.048)   | 0.040 | 0.019 (−0.014, 0.052)  | 0.262 |
|                     | Model 3 | 0.023 (−0.002, 0.048)  | 0.076 | 0.016 (−0.017, 0.049)  | 0.342 |
|                     | Model 4 | 0.024 (−0.002, 0.050)  | 0.071 | 0.016 (−0.017, 0.050)  | 0.340 |
|                     | Model 1 | 0.024 (0.0003, 0.0469) | 0.047 | 0.018 (−0.015, 0.051)  | 0.277 |

SD, standard deviation; SBP, systolic blood pressure; DBP, diastolic blood pressure; CIMT, Carotid Intima-Media Thickness; PWV, Pulse Wave Velocity; AIx, Augmentation Index; BMI, body mass index; WC, waist circumference; HDL-C, high density lipoprotein cholesterol; LDL-C, low density lipoprotein cholesterol; HOMA-IR, Homeostasis model assessment insulin resistance;

Data was analysed for 2675 females for all CVD risk factors. For CIMT, PWV, and AIx, data was analyzed for 1493, 1493, and 1411 females, respectively; 1 SD of total meat for female for all CVD risk factors was equal to 14.72 grams/day; 1 SD total meat for female for CIMT was equal to 14.93 grams/day; 1 SD total meat for female for PWV was equal to 14.93 grams/day; 1 SD total meat for female for AIx was equal to 15.07 grams/day; \* significant association after accounting for the effect of multiple testing using the Benjamini–Hochberg method;

\*β-coefficient of **2.21** means that a 1 SD (14.28 grams/day ) increase in meat intake among female participants was associated with 2.21 mg/dL higher total cholesterol after adjusting for the effect of potential confounders on total cholesterol.

†β-coefficient of **3.10** means that a 10 gram per 1000 kcal per day increase in meat intake among female participants was associated with 3.10 mg/dL higher total cholesterol after adjusting for the effect of potential confounders on total cholesterol.

**Supplementary Table S3.** Association between total meat intake and CVD risk factors and measures of subclinical atherosclerosis among *males* with no diagnosis of CVD or DM or hypertension: β-coefficients (95% confidence interval) per SD change and 10 gram per 1000 kcal per day of meat intake

| CVD risk factor                  | Regression Models | Per SD change          |         | 10 gram/1000 kcal/day  |         |
|----------------------------------|-------------------|------------------------|---------|------------------------|---------|
|                                  |                   | β-coef (95% CI)        | p-value | β-coef (95% CI)        | p-value |
| SBP, (n= 2861)                   | Model 1           | 0.79 (0.26, 1.31)      | 0.003*  | 1.18 (0.52, 1.84)      | <0.001* |
|                                  | Model 2           | 0.58 (0.06, 1.10)      | 0.028   | 0.95 (0.28, 1.61)      | 0.005   |
|                                  | Model 3           | 0.44 (−0.11, 0.99)     | 0.114   | 0.74 (0.39, 1.41)      | 0.029   |
|                                  | Model 4           | 0.28 (−0.29, 0.86)     | 0.335   | 0.75 (0.09, 1.41)      | 0.027   |
| DBP, (n= 2779)                   | Model 1           | 1.07 (0.63, 1.51)      | <0.001* | 1.32 (0.77, 1.87)      | <0.001* |
|                                  | Model 2           | 0.80 (0.37, 1.24)      | <0.001* | 1.04 (0.49, 1.59)      | <0.001* |
|                                  | Model 3           | 0.68 (0.23, 1.14)      | 0.003*  | 0.86 (0.31, 1.42)      | 0.002*  |
|                                  | Model 4           | 0.53 (0.06, 1.01)      | 0.028   | 0.87 (0.32, 1.43)      | 0.002*  |
| BMI, (n= 2861)                   | Model 1           | 0.51 (0.38, 0.63)      | <0.001* | 0.59 (0.43, 0.74)      | <0.001* |
|                                  | Model 2           | 0.39 (0.27, 0.52)      | <0.001* | 0.45 (0.29, 0.61)      | <0.001* |
|                                  | Model 3           | 0.40 (0.27, 0.53)      | <0.001* | 0.41 (0.25, 0.57)      | <0.001* |
|                                  | Model 4           | 0.28 (0.15, 0.42)      | <0.001* | 0.42 (0.26, 0.57)      | <0.001* |
| WC, (n= 3184)                    | Model 1           | 13.74 (10.38, 17.11)   | <0.001* | 15.40 (11.09, 19.71)   | <0.001* |
|                                  | Model 2           | 10.15 (6.82, 13.47)    | <0.001* | 11.16 (6.92, 15.40)    | <0.001* |
|                                  | Model 3           | 10.01 (6.53, 13.49)    | <0.001* | 9.85 (5.61, 14.09)     | <0.001* |
|                                  | Model 4           | 6.89 (3.26, 10.51)     | <0.001* | 10.05 (5.85, 14.26)    | <0.001* |
| Fasting Glucose (log), (n= 2861) | Model 1           | −0.005 (−0.006, 0.005) | 0.840   | −0.001 (−0.007, 0.006) | 0.970   |
|                                  | Model 2           | −0.002 (−0.007, 0.003) | 0.478   | −0.002 (−0.009, 0.005) | 0.540   |
|                                  | Model 3           | −0.002 (−0.007, 0.004) | 0.519   | −0.002 (−0.009, 0.004) | 0.464   |
|                                  | Model 4           | −0.002 (−0.008, 0.004) | 0.459   | −0.002 (−0.009, 0.004) | 0.466   |
| HOMA-IR (log), (n= 2861)         | Model 1           | 0.048 (0.017, 0.080)   | 0.003*  | 0.062 (0.021, 0.102)   | 0.003*  |
|                                  | Model 2           | 0.033 (0.001, 0.064)   | 0.044*  | 0.044 (0.003, 0.084)   | 0.036   |
|                                  | Model 3           | 0.037 (0.004, 0.070)   | 0.029   | 0.040 (−0.001, 0.080)  | 0.053   |
|                                  | Model 4           | 0.027 (−0.007, 0.062)  | 0.124   | 0.041 (0.001, 0.080)   | 0.049   |
| Total cholesterol, (n= 2861)     | Model 1           | 3.34 (2.08, 4.61)      | <0.001* | 4.57 (2.95, 6.19)      | <0.001* |
|                                  | Model 2           | 2.88 (1.60, 4.16)      | <0.001* | 4.03 (2.39, 5.66)      | <0.001* |
|                                  | Model 3           | 3.04 (1.70, 4.39)      | <0.001* | 3.71 (2.07, 5.35)      | <0.001* |
|                                  | Model 4           | 2.45 (1.04, 3.85)      | 0.001*  | 3.76 (2.12, 5.39)      | <0.001* |
| HDL, (n= 2861)                   | Model 1           | 0.009 (−0.42, 0.44)    | 0.969   | 0.29 (−0.26, 0.84)     | 0.299   |
|                                  | Model 2           | 0.16 (−0.28, 0.59)     | 0.477   | 0.46 (−0.91, 1.02)     | 0.101   |
|                                  | Model 3           | 0.23 (−0.23, 0.68)     | 0.329   | 0.52 (−0.03, 1.08)     | 0.065   |
|                                  | Model 4           | 0.19 (−0.29, 0.66)     | 0.441   | 0.53 (−0.03, 1.08)     | 0.063   |
| LDL, (n= 2861)                   | Model 1           | 2.34 (1.28, 3.40)      | <0.001* | 3.45 (2.10, 4.80)      | <0.001* |

|                      |         |                         |         |                         |         |
|----------------------|---------|-------------------------|---------|-------------------------|---------|
|                      | Model 2 | 1.87 (0.80, 2.94)       | 0.001*  | 2.92 (1.56, 4.28)       | <0.001* |
|                      | Model 3 | 2.02 (0.90, 3.14)       | <0.001* | 2.67 (1.31, 4.04)       | <0.001* |
|                      | Model 4 | 1.71 (0.54, 2.89)       | 0.004*  | 2.69 (1.33, 4.06)       | 0.001*  |
| TG (log), (n= 2861)  | Model 1 | 0.041 (0.025, 0.058)    | <0.001* | 0.040 (0.019, 0.061)    | <0.001* |
|                      | Model 2 | 0.036 (0.019, 0.053)    | <0.001* | 0.033 (0.012, 0.055)    | <0.001* |
|                      | Model 3 | 0.034 (0.017, 0.052)    | <0.001* | 0.028 (0.007, 0.050)    | 0.010*  |
|                      | Model 4 | 0.027 (0.008, 0.045)    | 0.005*  | 0.029 (0.007, 0.051)    | 0.009*  |
| CRP (log), (n= 2861) | Model 1 | 0.002 (−0.044, 0.049)   | 0.918   | 0.049 (−0.010, 0.108)   | 0.106   |
|                      | Model 2 | −0.010 (−0.057, 0.036)  | 0.664   | 0.035 (−0.025, 0.095)   | 0.252   |
|                      | Model 3 | −0.007 (−0.056, 0.042)  | 0.772   | 0.028 (−0.032, 0.097)   | 0.367   |
|                      | Model 4 | 0.007 (−0.045, 0.059)   | 0.791   | 0.027 (−0.033, 0.087)   | 0.379   |
| CIMT, (n= 1539)      | Model 1 | −0.011 (−0.020, −0.002) | 0.027*  | −0.015 (−0.029, −0.002) | 0.022   |
|                      | Model 2 | −0.007 (−0.016, 0.002)  | 0.133   | −0.011 (−0.024, 0.002)  | 0.107   |
|                      | Model 3 | −0.007 (−0.017, 0.003)  | 0.192   | −0.010 (−0.023, 0.003)  | 0.147   |
|                      | Model 4 | −0.004 (−0.015, 0.007)  | 0.440   | −0.010 (−0.023, 0.003)  | 0.141   |
| PWV (log), (n= 1517) | Model 1 | 0.010 (0.003, 0.017)    | 0.007*  | 0.010 (−0.001, 0.020)   | 0.055   |
|                      | Model 2 | 0.008 (0.001, 0.016)    | 0.023   | 0.008 (−0.002, 0.018)   | 0.133   |
|                      | Model 3 | 0.005 (−0.003, 0.012)   | 0.244   | 0.004 (−0.006, 0.014)   | 0.404   |
|                      | Model 4 | 0.001 (−0.007, 0.009)   | 0.828   | 0.005 (−0.006, 0.015)   | 0.378   |
| AI (log), (n= 1447)  | Model 1 | 0.047 (0.023, 0.070)    | <0.001* | 0.036 (0.003, 0.069)    | 0.033   |
|                      | Model 2 | 0.048 (0.024, 0.071)    | <0.001* | 0.036 (0.003, 0.070)    | 0.034   |
|                      | Model 3 | 0.042 (0.016, 0.068)    | 0.001*  | 0.029 (−0.004, 0.063)   | 0.088   |
|                      | Model 4 | 0.033 (0.006, 0.061)    | 0.016*  | 0.030 (−0.004, 0.063)   | 0.083   |

AIx, Augmentation Index; BMI, body mass index; CIMT, Carotid Intima-Media Thickness; CMD, cardiometabolic diseases; DBP, diastolic blood pressure; HDL-C, high density lipoprotein cholesterol; HOMA-IR, Homeostasis model assessment insulin resistance; LDL-C, low density lipoprotein cholesterol; SD, standard deviation; SBP, systolic blood pressure; PWV, Pulse Wave Velocity; WC, waist circumference; Data was analysed for 3184 males for all CVD risk factors. For CIMT, PWV, and AIx, data was analyzed for 1730, 1707, and 1631 males, respectively; 1 SD of total meat for male for all CVD risk factors was equal to 27.72 grams/day; 1 SD total meat for male for CIMT was equal to 25.87 grams/day; 1 SD total meat for male for PWV was equal to 25.95 grams/day; 1 SD total meat for male for AIx was equal to 26.35 grams/day; \*significant association after accounting for the effect of multiple testing using the Benjamini-Hochberg method.

**Supplementary Table S4.** Association between total meat intake and CVD risk factors and measures of subclinical atherosclerosis among *females* with no diagnosis of CVD or DM or hypertension:  $\beta$ -coefficients (95% confidence interval) per SD change and 10 gram per 1000 kcal per day of meat intake

| CVD risk factor                  | Regression Models | Per SD change          |         | 10 gram/1000 kcal/day  |         |
|----------------------------------|-------------------|------------------------|---------|------------------------|---------|
|                                  |                   | $\beta$ -coef (95% CI) | p-value | $\beta$ -coef (95% CI) | p-value |
| SBP, (n= 2496)                   | Model 1           | 0.55 (0.07, 1.03)      | 0.024   | 1.20 (0.49, 1.92)      | <0.001* |
|                                  | Model 2           | 0.48 (−0.01, 0.96)     | 0.051   | 1.13 (0.41, 1.85)      | 0.002*  |
|                                  | Model 3           | 0.42 (−0.10, 0.93)     | 0.111   | 1.09 (0.37, 1.81)      | 0.003*  |
|                                  | Model 4           | 0.51 (−0.02, 1.03)     | 0.057   | 1.05 (0.32, 1.77)      | <0.001* |
| DBP, (n= 2496)                   | Model 1           | 0.51 (0.10, 0.91)      | 0.014*  | 0.91 (0.30, 1.51)      | 0.003*  |
|                                  | Model 2           | 0.43 (0.02, 0.83)      | 0.039   | 0.83 (0.22, 1.43)      | 0.007*  |
|                                  | Model 3           | 0.42 (−0.02, 0.85)     | 0.060   | 0.82 (0.21, 1.42)      | 0.009*  |
|                                  | Model 4           | 0.47 (0.03, 0.91)      | 0.037   | 0.80 (0.18, 1.40)      | 0.011*  |
| BMI, (n= 2496)                   | Model 1           | 0.23 (0.09, 0.38)      | 0.002*  | 0.23 (0.02, 0.45)      | 0.039*  |
|                                  | Model 2           | 0.16 (0.01, 0.30)      | 0.033*  | 0.15 (−0.07, 0.36)     | 0.183   |
|                                  | Model 3           | 0.11 (−0.05, 0.26)     | 0.168   | 0.13 (−0.09, 0.34)     | 0.251   |
|                                  | Model 4           | 0.10 (−0.06, 0.26)     | 0.224   | 0.14 (−0.08, 0.36)     | 0.211   |
| WC, (n= 2496)                    | Model 1           | 6.77 (3.24, 10.29)     | <0.001* | 5.86 (0.55, 11.17)     | 0.030*  |
|                                  | Model 2           | 4.96 (1.45, 8.48)      | 0.006*  | 3.88 (−1.39, 9.15)     | 0.149   |
|                                  | Model 3           | 3.23 (−0.52, 6.98)     | 0.091   | 3.08 (−2.20, 8.35)     | 0.253   |
|                                  | Model 4           | 2.60 (−1.22, 6.42)     | 0.182   | 3.65 (−1.65, 8.94)     | 0.177   |
| Fasting Glucose (log), (n= 2496) | Model 1           | 0.005 (−0.001, 0.011)  | 0.094   | 0.013 (0.004, 0.021)   | 0.004*  |
|                                  | Model 2           | 0.003 (−0.002, 0.009)  | 0.255   | 0.011 (0.002, 0.020)   | 0.012*  |
|                                  | Model 3           | 0.005 (−0.001, 0.011)  | 0.106   | 0.012 (0.003, 0.020)   | 0.008*  |
|                                  | Model 4           | 0.006 (−0.001, 0.013)  | 0.076   | 0.012 (0.003, 0.020)   | 0.009*  |

|                              |         |                         |         |                         |        |
|------------------------------|---------|-------------------------|---------|-------------------------|--------|
| HOMA-IR (log), (n= 2496)     | Model 1 | 0.049 (0.019, 0.079)    | 0.001*  | 0.079 (0.033, 0.123)    | 0.001* |
|                              | Model 2 | 0.037 (0.007, 0.067)    | 0.017*  | 0.065 (0.019, 0.110)    | 0.005* |
|                              | Model 3 | 0.037 (0.005, 0.069)    | 0.023*  | 0.064 (0.018, 0.109)    | 0.006* |
|                              | Model 4 | 0.036 (0.003, 0.068)    | 0.032*  | 0.066 (0.021, 0.112)    | 0.004* |
| Total cholesterol, (n= 2496) | Model 1 | 2.36 (1.07, 3.64)       | <0.001* | 3.20 (1.26, 5.13)       | 0.001* |
|                              | Model 2 | 2.20 (0.91, 3.50)       | 0.001*  | 3.01 (1.07, 4.95)       | 0.002* |
|                              | Model 3 | 2.45 (1.07, 3.83)       | 0.001*  | 3.02 (1.08, 4.97)       | 0.002* |
|                              | Model 4 | 2.45 (1.04, 3.86)       | 0.001*  | 3.13 (1.17, 5.08)       | 0.002* |
| HDL, (n= 2496)               | Model 1 | 0.23 (−0.22, 0.68)      | 0.309   | −0.07 (−0.75, 0.61)     | 0.832  |
|                              | Model 2 | 0.30 (−0.16, 0.75)      | 0.198   | −0.01 (−0.69, 0.67)     | 0.979  |
|                              | Model 3 | 0.34 (−0.15, 0.83)      | 0.169   | −0.02 (−0.70, 0.67)     | 0.959  |
|                              | Model 4 | 0.25 (−0.24, 0.75)      | 0.314   | 0.05 (−0.63, 0.74)      | 0.879  |
| LDL, (n= 2496)               | Model 1 | 1.85 (0.78, 2.91)       | 0.001*  | 2.62 (1.01, 4.23)       | 0.001* |
|                              | Model 2 | 1.65 (0.57, 2.72)       | 0.003*  | 2.39 (0.78, 4.00)       | 0.004* |
|                              | Model 3 | 1.78 (0.64, 2.93)       | 0.002*  | 2.40 (0.78, 4.01)       | 0.004* |
|                              | Model 4 | 1.83 (0.66, 3.00)       | 0.002*  | 2.44 (0.82, 4.06)       | 0.003* |
| TG (log), (n= 2496)          | Model 1 | 0.014 (−0.002, 0.030)   | 0.091   | 0.027 (0.002, 0.052)    | 0.032* |
|                              | Model 2 | 0.014 (−0.002, 0.030)   | 0.098   | 0.027 (0.002, 0.051)    | 0.034* |
|                              | Model 3 | 0.015 (−0.003, 0.032)   | 0.096   | 0.026 (0.002, 0.051)    | 0.037* |
|                              | Model 4 | 0.016 (−0.002, 0.034)   | 0.082   | 0.026 (0.002, 0.051)    | 0.038* |
| CRP (log), (n= 2496)         | Model 1 | 0.055 (0.007, 0.103)    | 0.025*  | 0.047 (−0.025, 0.119)   | 0.202  |
|                              | Model 2 | 0.042 (−0.007, 0.090)   | 0.091   | 0.032 (−0.040, 0.105)   | 0.382  |
|                              | Model 3 | 0.048 (−0.004, 0.099)   | 0.070   | 0.034 (−0.039, 0.107)   | 0.358  |
|                              | Model 4 | 0.041 (−0.011, 0.094)   | 0.124   | 0.040 (−0.033, 0.113)   | 0.280  |
| CIMT, (n= 1375)              | Model 1 | 0.003 (−0.006, 0.013)   | 0.498   | 0.003 (−0.012, 0.017)   | 0.715  |
|                              | Model 2 | 0.005 (−0.005, 0.015)   | 0.353   | 0.004 (−0.011, 0.018)   | 0.605  |
|                              | Model 3 | 0.006 (−0.005, 0.016)   | 0.307   | 0.004 (−0.010, 0.019)   | 0.586  |
|                              | Model 4 | 0.005 (−0.006, 0.015)   | 0.404   | 0.005 (−0.009, 0.020)   | 0.479  |
| PWV (log), (n= 1365)         | Model 1 | −0.007 (−0.014, 0.001)  | 0.053   | −0.013 (−0.023, −0.002) | 0.021  |
|                              | Model 2 | −0.008 (−0.015, −0.001) | 0.034   | −0.013 (−0.024, −0.003) | 0.016  |
|                              | Model 3 | −0.007 (−0.015, 0.001)  | 0.079   | −0.012 (−0.023, −0.001) | 0.030  |
|                              | Model 4 | −0.007 (−0.015, 0.002)  | 0.109   | −0.013 (−0.023, −0.002) | 0.018  |
| AI (log), (n= 1285)          | Model 1 | 0.021 (−0.003, 0.045)   | 0.087   | 0.017 (−0.018, 0.051)   | 0.335  |
|                              | Model 2 | 0.022 (−0.003, 0.046)   | 0.083   | 0.017 (−0.018, 0.052)   | 0.332  |
|                              | Model 3 | 0.020 (−0.006, 0.046)   | 0.133   | 0.015 (−0.020, 0.050)   | 0.402  |
|                              | Model 4 | 0.020 (−0.006, 0.047)   | 0.130   | 0.015 (−0.020, 0.051)   | 0.393  |

AIx, Augmentation Index; BMI, body mass index; CIMT, Carotid Intima-Media Thickness; CMD, cardiometabolic diseases; DBP, diastolic blood pressure; HDL-C, high density lipoprotein cholesterol; HOMA-IR, Homeostasis model assessment insulin resistance; LDL-C, low density lipoprotein cholesterol; SD, standard deviation; SBP, systolic blood pressure; PWV, Pulse Wave Velocity; WC, waist circumference; Data was analysed for 2828 females for all CVD risk factors. For CIMT, PWV, and AIx, data was analyzed for 1573, 1570, and 1480 females, respectively; \*significant association after accounting for the effect of multiple testing using the Benjamini-Hochberg method; 1 SD of total meat for female for all CVD risk factors was equal to 14.28 grams/day; 1-sd total meat for female for CIMT was equal to 14.9 grams/day; 1 SD total meat for female for PWV was equal to 14.9 grams/day; 1 SD total meat for female for AIx was equal to 15.04 grams/day;
